# Supplementary material
Source: Springer Nature journal article supplement (https://www.springermedizin.de/resource/supplementary/12936_2010_1271_MOESM4_ESM.pdf/9549374)

A. Rufiji

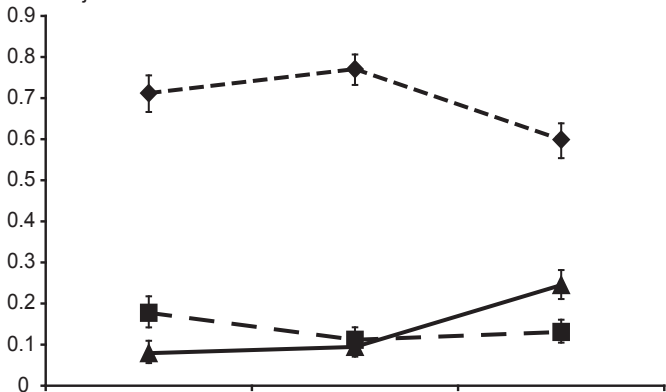

B. Kilombero Ulanga

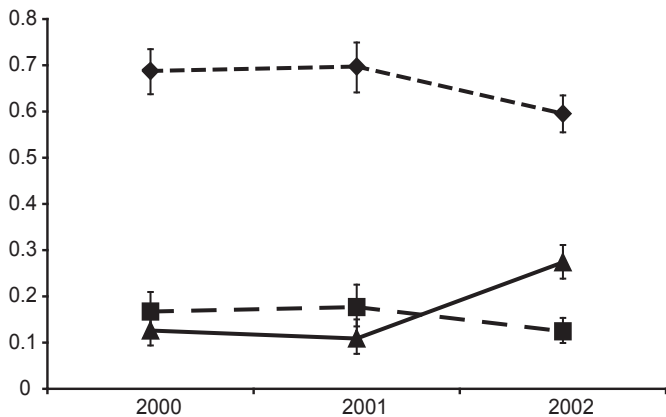

Supplement: MOESM4 [file 9549374]
